# Supplementary material for: Methylation profiles of thirty four promoter-CpG islands and concordant methylation behaviours of sixteen genes that may contribute to carcinogenesis of astrocytoma
Source: PubMed Central journal article supplement (PMC520749; doi:10.1186/1471-2407-4-65), 2004-09-14

15

## IRF7

B12 B13 B14 B15 B16 B17 B18 B19  
 U M U M U M U M \* U M U M U M U M

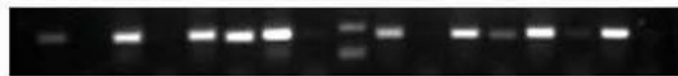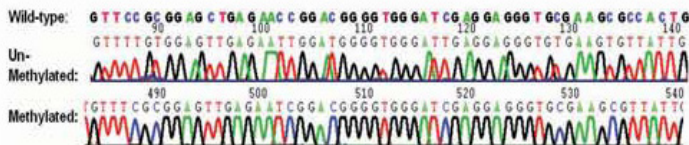

16

## LKB1

5 7 8 9 10 11 12  
 U M U M U M U M \* U M U M U M

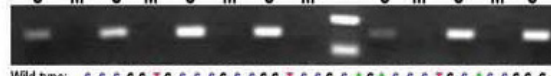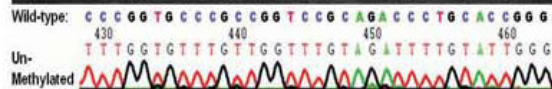

17

## MAGEA1

21 22 23 24 25 26 A1 A2  
 U M U M U M U M \* U M U M U M U M

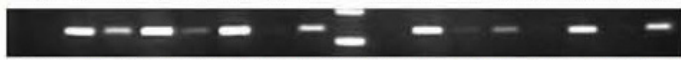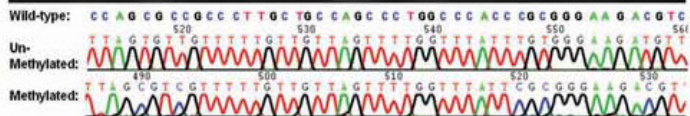

18

## MGMT

8 9 11 12 14 20 21  
 U M U M U M U M \* U M U M U M

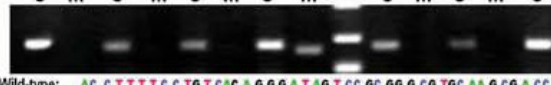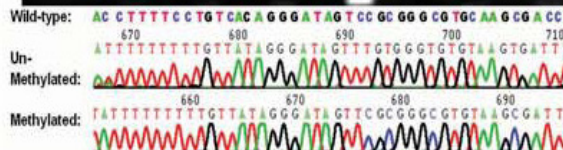

19

## MT1A

25 26 A4 A5 A6 A8 A9 A11  
 U M U M U M U M \* U M U M U M U M

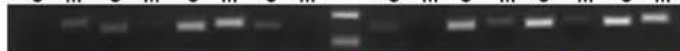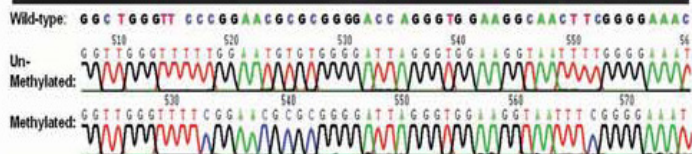

20

## MYOD1

9 11 12 14 20 21 A2  
 U M U M U M U M \* U M U M U M

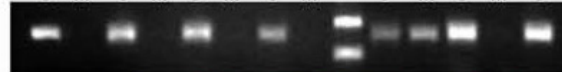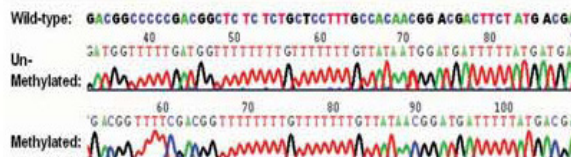

21

## OCT6

5 26 A4 A6 A8 A9 A11 8  
 U M U M U M U M \* U M U M U M U M

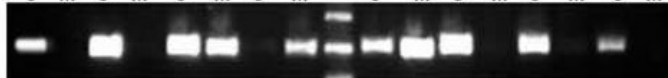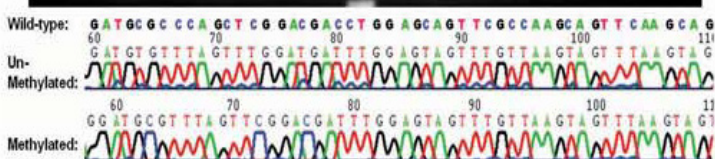

22

p14<sup>ARF</sup>

5 7 8 9 10 11  
 U M U M U M U M \* U M U M U M

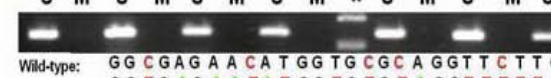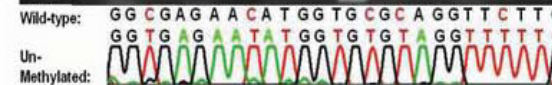

Supplement: 1471-2407-4-65-S4.pdf [file 1471-2407-4-65-S4.pdf]
