# Supplementary material for: Methylation profiles of thirty four promoter-CpG islands and concordant methylation behaviours of sixteen genes that may contribute to carcinogenesis of astrocytoma
Source: PubMed Central journal article supplement (PMC520749; doi:10.1186/1471-2407-4-65), 2004-09-14
Supplement: 1471-2407-4-65-S10.pdf [file 1471-2407-4-65-S10.pdf]

Total

a.

| Number | Co-occurrence(/53) (Frequency) (%) | Occurrence of any target in subset(Frequency) | The gene(s) in subset |     |      |
|--------|------------------------------------|-----------------------------------------------|-----------------------|-----|------|
| 1      | 37 (69.8)                          | 37 (69.8)                                     | RASSF1A               |     |      |
| 2      | 20 (37.7)                          | 42 (79.3)                                     | RASSF1A               | p73 |      |
| 3      | 11 (20.8)                          | 44 (83)                                       | RASSF1A               | p73 | CDH1 |
| 3      | 11 (20.8)                          | 43 (81.1)                                     | RASSF1A               | p73 | OC76 |

Gender

b. Female

| Number | Co-occurrence(/27) (Frequency) (%) | Occurrence of any target in subset(Frequency) | The gene(s) in subset |     |      |
|--------|------------------------------------|-----------------------------------------------|-----------------------|-----|------|
| 1      | 21 (77.8)                          | 21 (77.8)                                     | RASSF1A               |     |      |
| 2      | 13 (48.1)                          | 23 (85.2)                                     | RASSF1A               | p73 |      |
| 3      | 9 (33.3)                           | 25 (92.6)                                     | RASSF1A               | p73 | CDH1 |

c. Male

| Number | Co-occurrence(/26) (Frequency) (%) | Occurrence of any target in subset(Frequency) | The gene(s) in subset |      |        |
|--------|------------------------------------|-----------------------------------------------|-----------------------|------|--------|
| 1      | 16 (61.5)                          | 16 (61.5)                                     | RASSF1A               |      |        |
| 2      | 10 (38.5)                          | 17 (65.4)                                     | RASSF1A               | IRF7 |        |
| 3      | 5 (19.2)                           | 20 (76.9)                                     | RASSF1A               | IRF7 | p73    |
| 3      | 5 (19.2)                           | 20 (76.9)                                     | RASSF1A               | IRF7 | MGMT   |
| 3      | 5 (19.2)                           | 21 (80.8)                                     | RASSF1A               | p73  | MGMT   |
| 3      | 5 (19.2)                           | 18 (69.2)                                     | RASSF1A               | IRF7 | MAGEA1 |
| 3      | 5 (19.2)                           | 18 (69.2)                                     | RASSF1A               | IRF7 | MT1A   |

Grade

d. Grade I

| Number | Co-occurrence(/14) (Frequency) (%) | Occurrence of any target in subset(Frequency) | The gene(s) in subset |      |        |
|--------|------------------------------------|-----------------------------------------------|-----------------------|------|--------|
| 1      | 10 (71.4)                          | 10 (71.4)                                     | RASSF1A               |      |        |
| 2      | 6 (42.9)                           | 11 (78.6)                                     | RASSF1A               | p73  |        |
| 3      | 3 (21.4)                           | 12 (85.7)                                     | RASSF1A               | p73  | CDH1   |
| 3      | 3 (21.4)                           | 11 (78.6)                                     | RASSF1A               | p73  | MAGEA1 |
| 3      | 3 (21.4)                           | 11 (78.6)                                     | RASSF1A               | CDH1 | WT1    |
| 3      | 3 (21.4)                           | 12 (85.7)                                     | RASSF1A               | p73  | IRF7   |

e. Grade II

| Number | Co-occurrence(/15) (Frequency) (%) | Occurrence of any target in subset(Frequency) | The gene(s) in subset |      |      |
|--------|------------------------------------|-----------------------------------------------|-----------------------|------|------|
| 1      | 12 (80.0)                          | 12 (80.0)                                     | RASSF1A               |      |      |
| 2      | 5 (33.3)                           | 13 (86.7)                                     | RASSF1A               | MGMT |      |
| 2      | 5 (33.3)                           | 12 (80.0)                                     | RASSF1A               | IRF7 |      |
| 3      | 3 (20.0)                           | 14 (93.3)                                     | RASSF1A               | MGMT | p73  |
| 3      | 3 (20.0)                           | 13 (86.7)                                     | RASSF1A               | p73  | CDH1 |
| 3      | 3 (20.0)                           | 13 (86.7)                                     | RASSF1A               | IRF7 | MT1A |

f. Grade III

| Number | Co-occurrence(/12) (Frequency) (%) | Occurrence of any target in subset(Frequency) | The gene(s) in subset |      |      |
|--------|------------------------------------|-----------------------------------------------|-----------------------|------|------|
| 1      | 8 (66.7)                           | 8 (66.7)                                      | RASSF1A               |      |      |
| 2      | 5 (41.7)                           | 8 (66.7)                                      | RASSF1A               | CDH1 |      |
| 3      | 4 (33.3)                           | 9 (75.0)                                      | RASSF1A               | CDH1 | MGMT |

g. Grade IV

| Number | Co-occurrence(/12) (Frequency) (%) | Occurrence of any target in subset(Frequency) | The gene(s) in subset |     |      |
|--------|------------------------------------|-----------------------------------------------|-----------------------|-----|------|
| 1      | 7 (58.3)                           | 7 (58.3)                                      | RASSF1A               |     |      |
| 1      | 7 (58.3)                           | 7 (58.3)                                      |                       | p73 |      |
| 2      | 6 (50.0)                           | 8 (66.7)                                      | RASSF1A               | p73 |      |
| 3      | 4 (33.3)                           | 9 (75.0)                                      | RASSF1A               | p73 | MGMT |
| 3      | 4 (33.3)                           | 9 (75.0)                                      | RASSF1A               | p73 | OC76 |
